# Supplementary material for: Evidence of Alternative Cystatin C Signal Sequence Cleavage Which Is Influenced by the A25T Polymorphism
Source: PubMed Central journal article supplement (PMC4741414; doi:10.1371/journal.pone.0147684), 2016-02-04
Supplement: pone.0147684.s006.pdf [file pone.0147684.s006.pdf]

| version     | predicted most likely<br>signal seq cleavage site |
|-------------|---------------------------------------------------|
| SignalP 2.0 | between Gly26 and Ser27                           |
| SignalP 3.0 | between Gly26 and Ser27                           |
| SignalP 4.0 | between Ala20 and Val21                           |
| SignalP 4.1 | between Ala20 and Val21                           |
